# Supplementary material for: On a heavy path – determining cold plasma-derived short-lived species chemistry using isotopic labelling
Source: Royal Society of Chemistry journal article supplement (doi:10.1039/c9ra08745a), 2020-01-01
Supplement: c9ra08745a1.pdf [file c9ra08745a1.pdf]

### Supporting Information

Mass spectrometry was carried out on a TripleTOF 5600 system (Sciex). Samples were diluted 1:1 with alkaline buffer (0.3 % ammonium hydroxide in methanol) and directly infused using an electronically controlled syringe pump. Each sample was acquired for 1 min using identical system settings for all samples (capillary temperature 150 °C, curtain gas: 35 psi N<sub>2</sub>, ion source gas 1:20 psi N<sub>2</sub>, ion source gas 2: 25 psi N<sub>2</sub>, ion spray voltage: -4 kV).

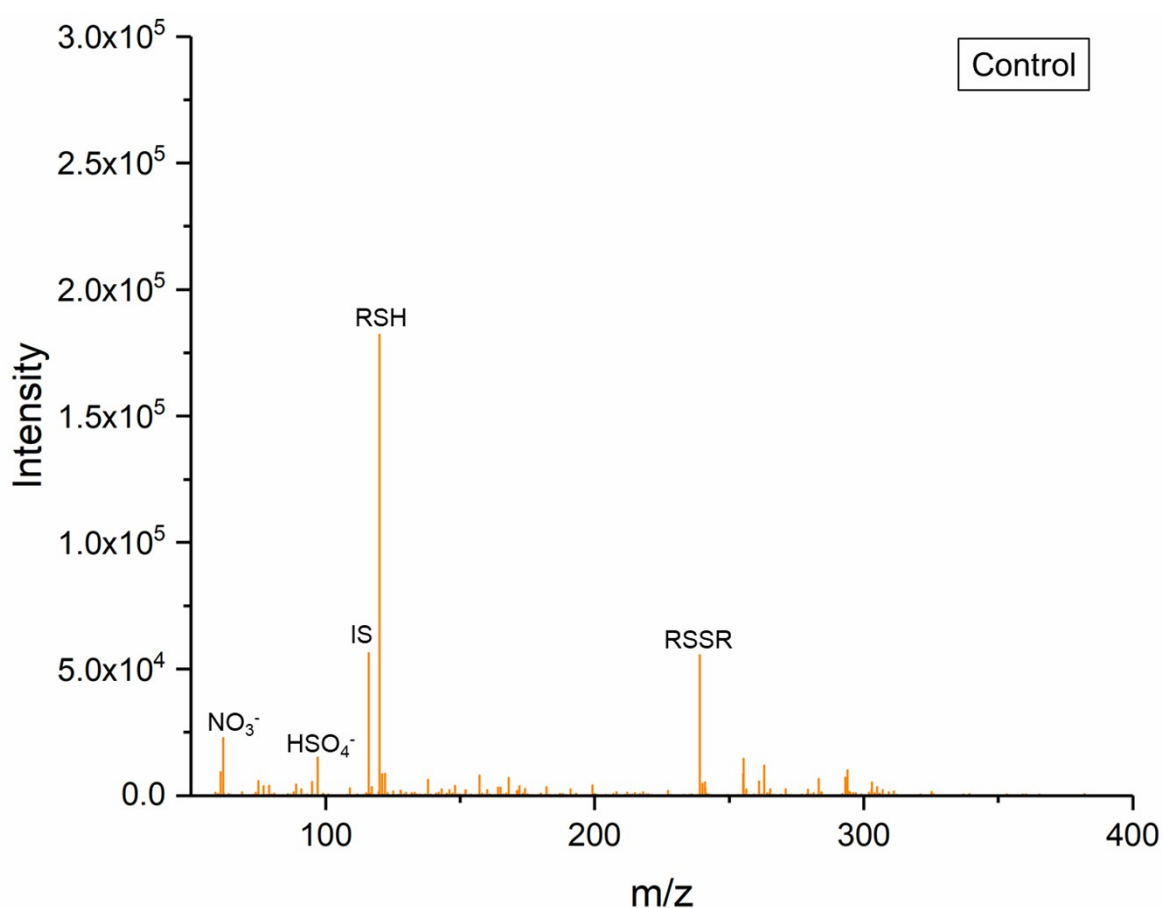

Fig. 1: HRMS (direct infusion, positive mode) cysteine 300 μM in H<sub>2</sub><sup>16</sup>O (control)

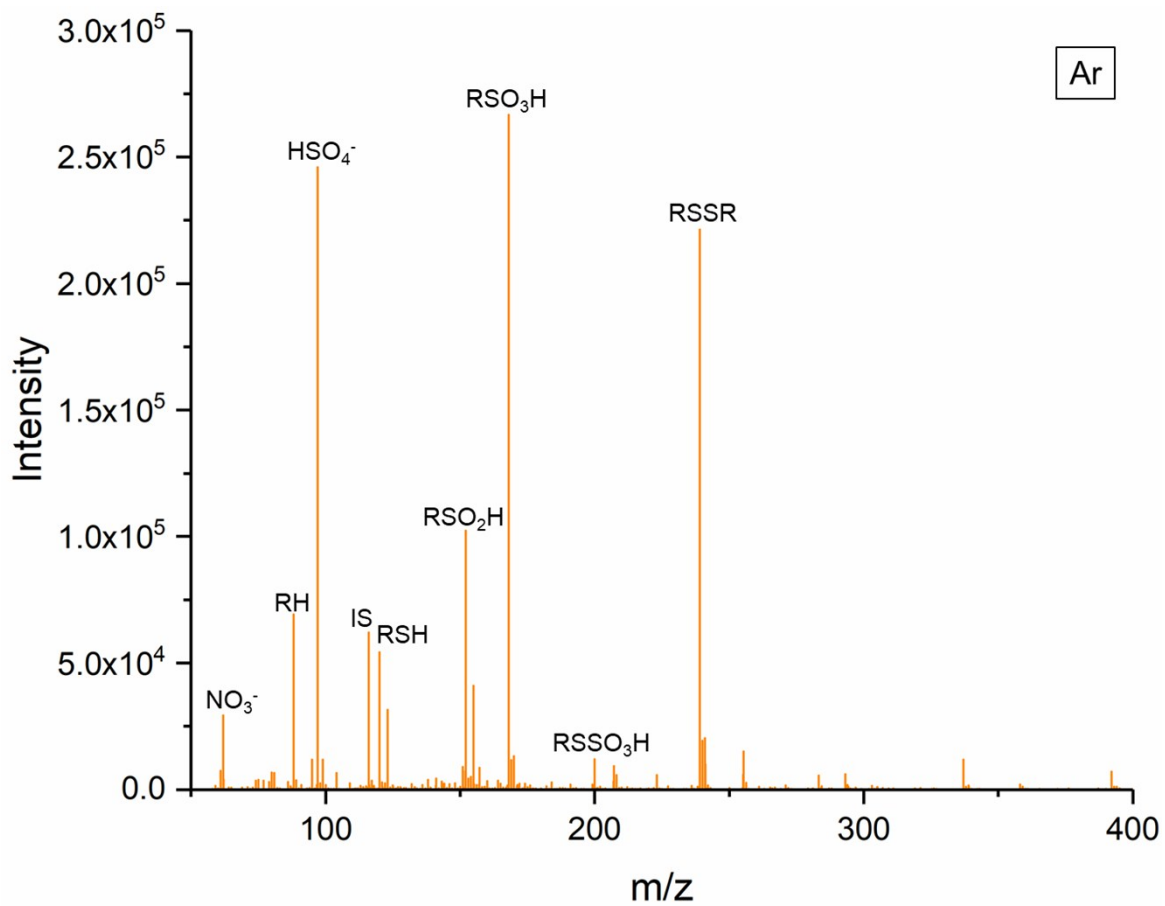

Fig. 2: HRMS (direct infusion, positive mode) cysteine 300 μM in H<sub>2</sub><sup>16</sup>O, 1 min argon plasma treatment

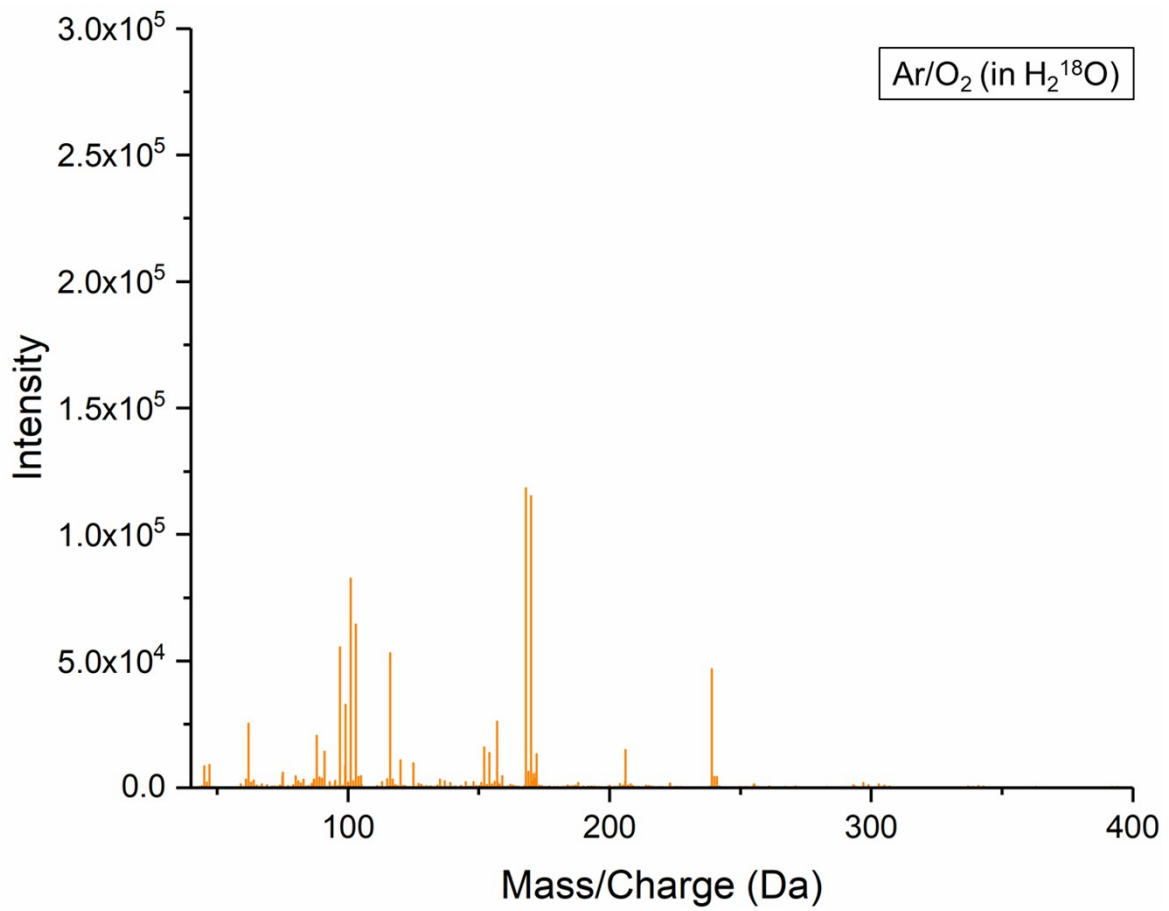

Fig. 3: HRMS (direct infusion, positive mode) cysteine 300  $\mu$ M dissolved in H<sub>2</sub><sup>18</sup>O, 1 min argon plasma treatment

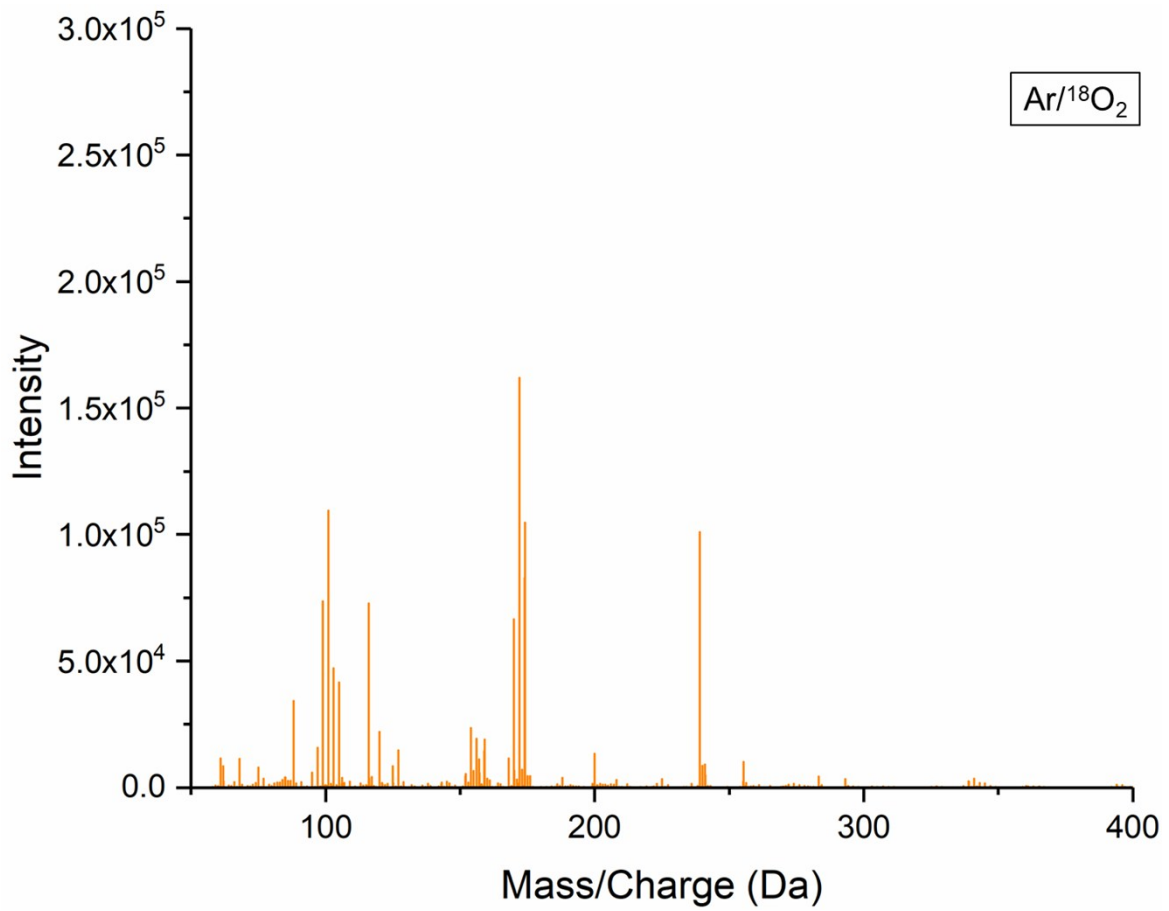

Fig. 4: HRMS (direct infusion, positive mode) cysteine 300 μM dissolved in H<sub>2</sub><sup>16</sup>O, 1 min argon/<sup>18</sup>O<sub>2</sub> plasma treatment
